# Supplementary material for: Enhancement of Gas Barrier Properties and Durability of Poly(butylene succinate-co-butylene adipate)-Based Nanocomposites for Food Packaging Applications
Source: MDPI journal article supplement (doi:10.3390/nano12060978), 2022-03-16
Supplement: s1 [file s1]

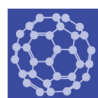

## Supplementary Materials

## Enhancement of Gas Barrier Properties and Durability of Poly(butylene Succinate-Co-butylene Adipate)-Based Nanocomposites for Food Packaging Applications

Astrid E. Delorme <sup>1,\*</sup>, Tanja Radusin <sup>2</sup>, Petri Myllytie <sup>2</sup>, Vincent Verney <sup>1</sup> and Haroutioun Askanian <sup>1,\*</sup>

<sup>1</sup> Université Clermont Auvergne, CNRS, Clermont Auvergne INP, ICCF, 63000, Clermont-Ferrand, France. CNRS, SIGMA Clermont, ICCF, Université Clermont Auvergne, 63000 Clermont-Ferrand, France; vincent.verney@uca.fr (V.V.)

<sup>2</sup> Norner Research, Dokkvegen 20 NO-3920 Porsgunn, Norway; ; tanja.radusin@norner.no (T.R.); petri.myllytie@norner.no (P.M.)

\* Correspondence: astrid.delorme@sigma-clermont.fr (A.E.D.); haroutioun.askanian@sigma-clermont.fr (H.A.); Tel.: +33-(0)473405389 (H.A.)

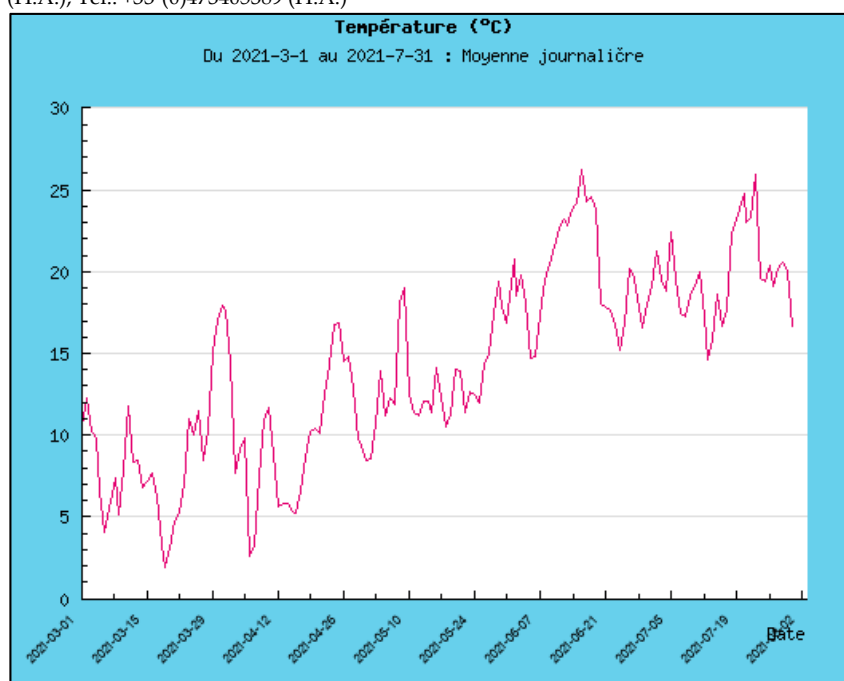

**Figure S1.** Average daily temperature measured at Cézeaux station (45°45'37 N – 3°06'43 E 394 m asl.) during the period of sampling from March 2021 to July 2021. The data was obtained from Observatoire de Physique du Globe de Clermont-Ferrand (<http://www.obs.univ-bpclermont.fr/SO/mesures/pdd.php>) (accessed on 01/12/2021).

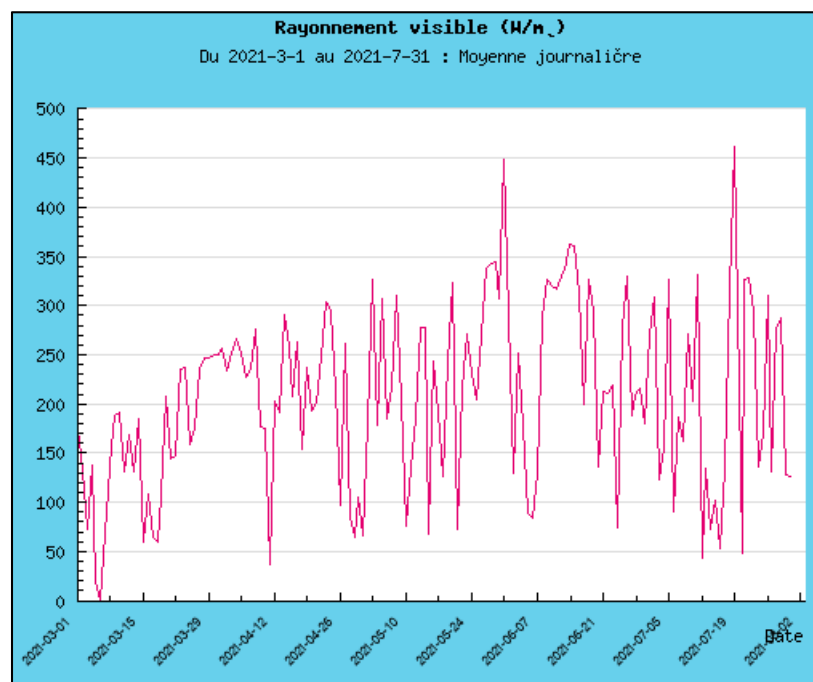

**Figure S2.** Average UV radiation measured at Cézeaux station (45°45'37 N – 3°06'43 E, 394 m asl.) during the period of sampling from March 2021 to July 2021. The data was obtained from Observatoire de Physique du Globe de Clermont-Ferrand (<http://www.observatoire-physique-du-globe.fr/SO/mesures/pdd.php>) (accessed on 01/12/2021).

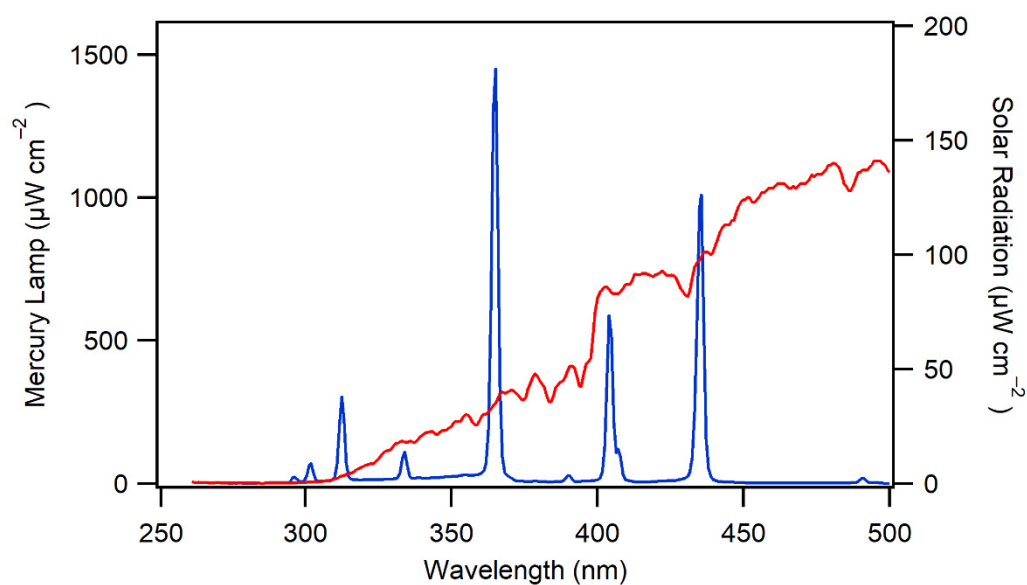

**Figure S3.** Emission spectrum of a Mercury lamp used in the SEPAP machine (blue line) and Solar radiation arriving at earth (red line).

### Size analyses from SEM images

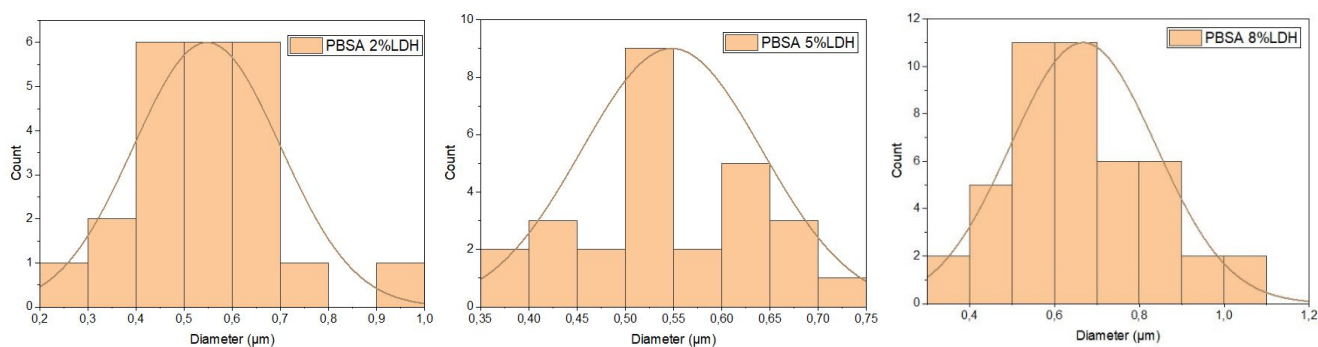

**Figure S4.** Size distribution (diameter) of detected LDH particulates in SEM images, treated with ImageJ software. The majority (>90%) of the detected particulates are equal or smaller than average SORBACID® 911 particle size (d50) of  $\leq 1 \mu\text{m}$ .

### Thermal analyses

**Table S1.** TGA results of PBSA and PBSA composites.

| Sample        | Onset of decomposition, °C | Temperature at 50% weight loss, °C | Peak of 1 <sup>st</sup> derivative, °C | Residue at 600 °C, % |
|---------------|----------------------------|------------------------------------|----------------------------------------|----------------------|
| PBSA          | 372.4                      | 398.5                              | 401.8                                  | 1.34                 |
| PBSA + 2% LDH | 338.5                      | 367.8                              | 376.8                                  | 5.3                  |
| PBSA + 5% LDH | 317.3                      | 351.8                              | 360.2                                  | 6.1                  |
| PBSA + 8% LDH | 331.0                      | 356.2                              | 355.2                                  | 5.4                  |

### Infrared spectroscopy of PBSA and PBSA-LDH nanocomposite

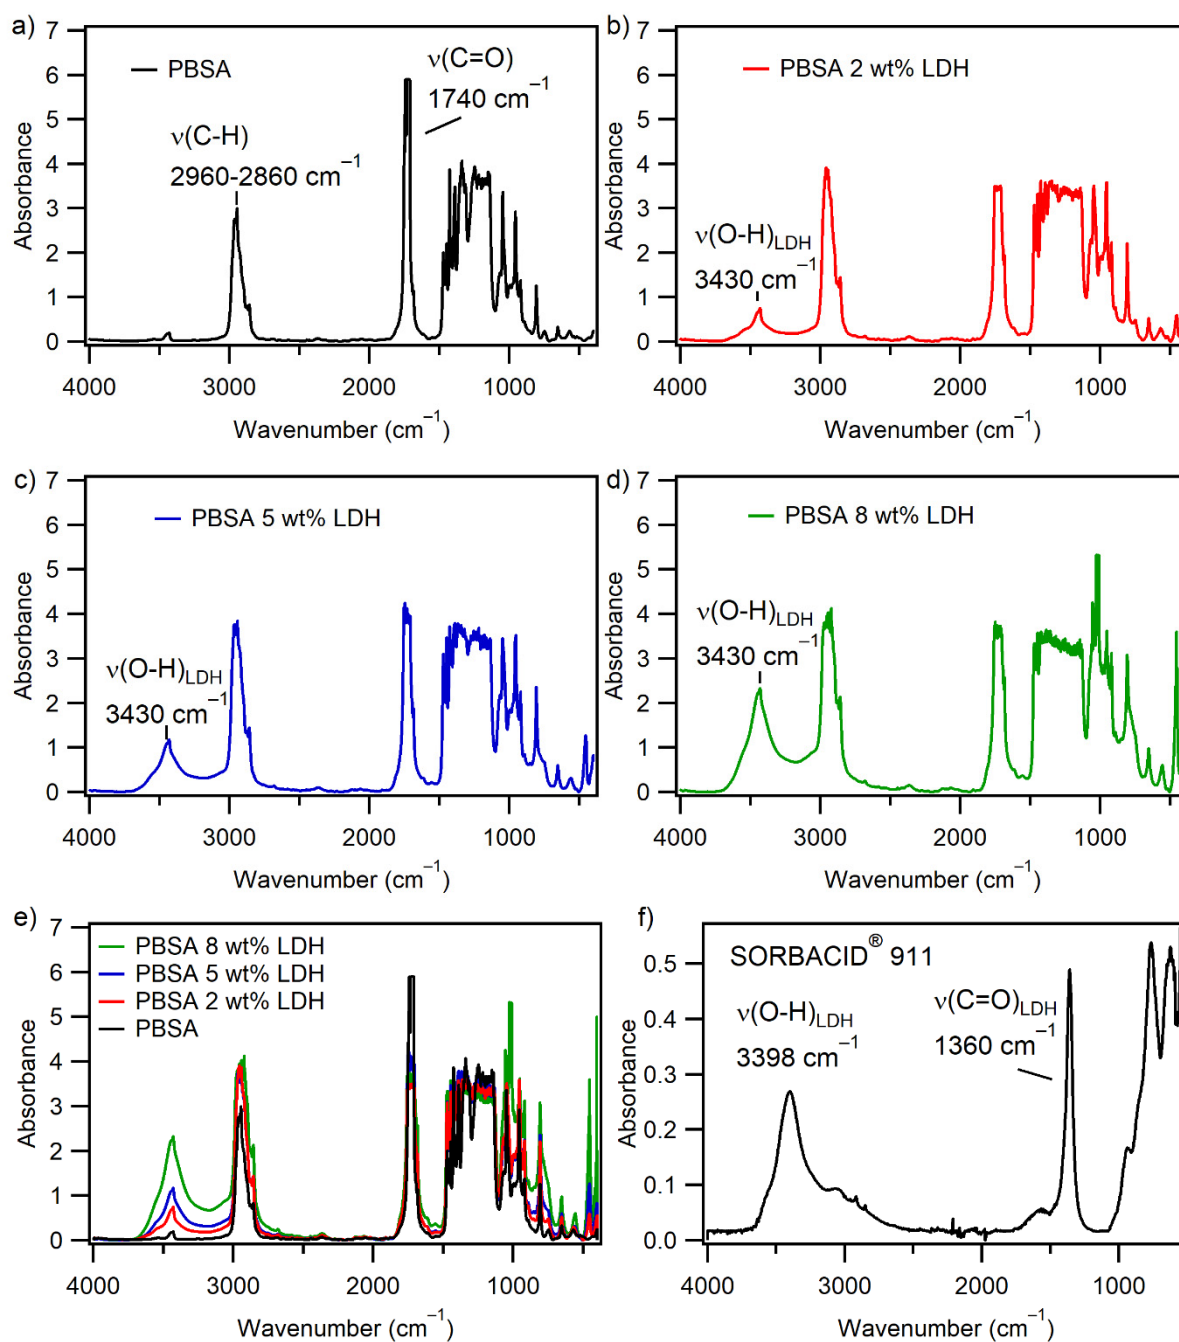

**Figure S5.** FT-IR spectra of (a) PBSA (b) PBSA 2 wt% LDH, (c) PBSA 5 wt% LDH and (d) PBSA 8 wt% LDH. The spectra of neat PBSA and PBSA-LDH nanocomposites are compared in (e) and the IR spectrum of SORBACID® 911 is shown in (f).

#### UV-Vis spectra of PBSA-LDH films

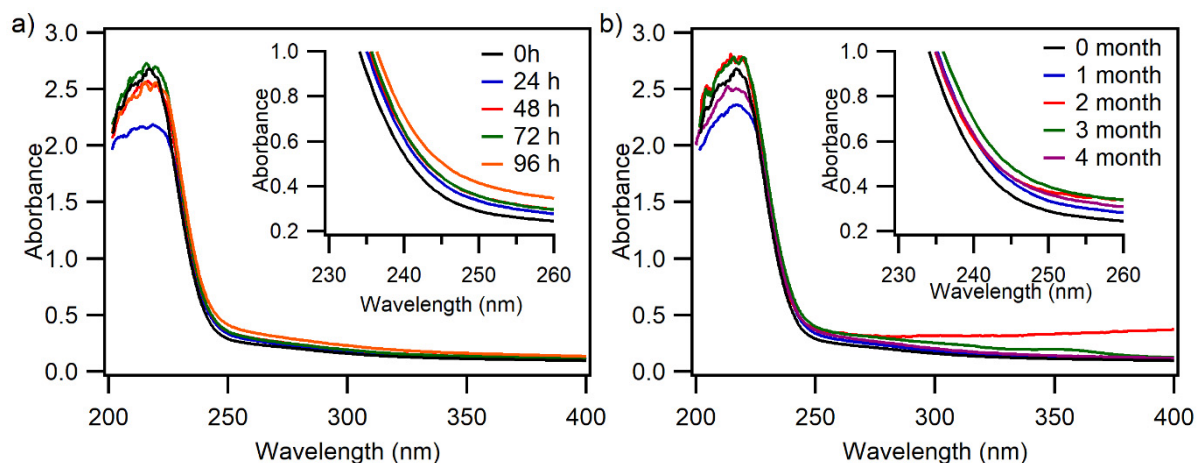

**Figure S6.** UV-Vis spectra of PBSA before exposure to UV-radiation (black line) and (a) after 24 hrs (blue line), 48 h (red line), 72 h (green line), 96 h (orange line) exposure to UV-radiation, and after (b) 1 month (blue line), 2 months (red line), 3 months (green line) and 4 months (orange line) of being exposed to natural weathering.

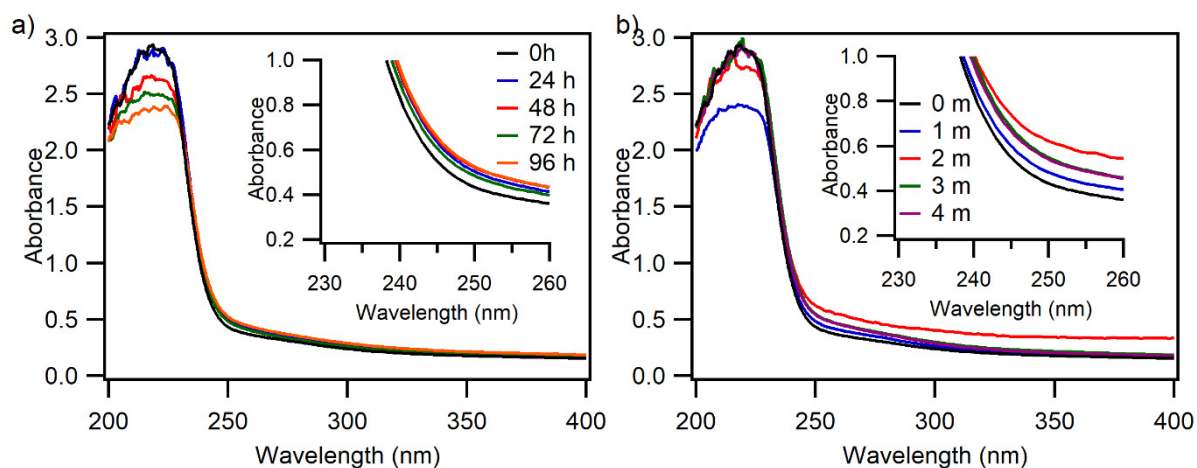

**Figure S7.** UV-Vis spectra of PBSA + 2% LDH before exposure to UV-radiation (black line) and (a) after 24 h (blue line), 48 h (red line), 72 h (green line), 96 h (orange line) exposure to UV-radiation, and after (b) 1 month (blue line), 2 months (red line), 3 months (green line) and 4 months (orange line) of being exposed to natural weathering.

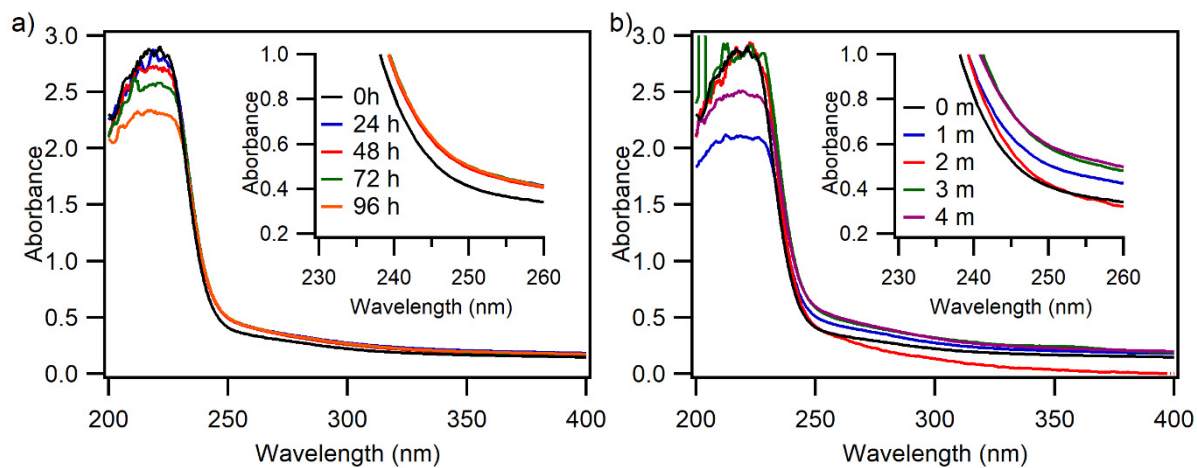

**Figure S8.** UV-Vis spectra of PBSA + 5% LDH before exposure to UV-radiation (black line) and (a) after 24 h (blue line), 48 h (red line), 72 h (green line), 96 h (orange line) exposure to UV-radiation in the SEPAP, and after (b) 1 month (blue line), 2 months (red line), 3 months (green line) and 4 months (orange line) of being exposed to natural weathering.

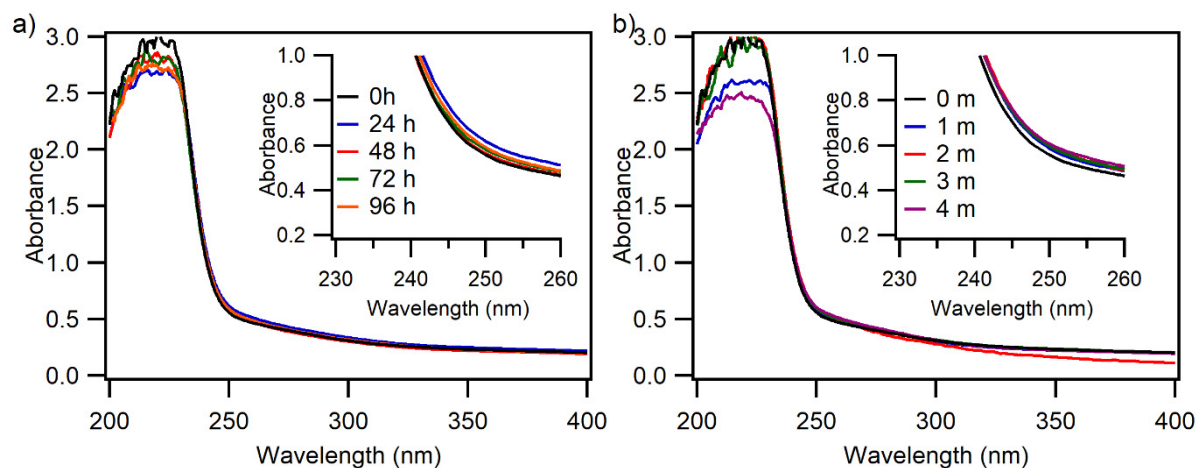

**Figure S9.** UV-Vis spectra of PBSA + 8% LDH before exposure to UV-radiation (black line) and (a) after 24 h (blue line), 48 h (red line), 72 h (green line), 96 h (orange line) exposure to UV-radiation in the SEPAP, and after (b) 1 month (blue line), 2 months (red line), 3 months (green line) and 4 months (orange line) of being exposed to natural weathering.

### Melt Rheology.

Melt rheology provides a convenient tool to study the competition of chain scissions and recombination reactions occurring through aging of polymers. It is well-known that the zero shear viscosity,  $\eta_0$ , depends on the molecular weight ( $M_w$ ) and obeys to a power law as described in equation 1[1, 2].

$$\eta_0 \propto M_w^\alpha, \quad (1)$$

The change in molecular weight of a polymeric material as result of degradation provides valuable information of degradation pathways at a molecular level. By measuring the  $\eta_0$  over the time of aging of a polymer. The changes in  $\eta_0$  can indicate whether there is a change in molecular weight of the polymer. A change in the molecular weight as a polymer is aged suggests that a transformation at the molecular level has occurred, leading either to a higher or lower molecular weight. A lower  $\eta_0$  of a polymer than its initial  $\eta_0$  corresponds to lower molecular weight. the polymer has been subjected to a chain scission mechanism. Vice versa a higher  $\eta_0$  correlates to higher molecular weight of the polymer and the polymer has been subjected to a transformation described as a chain recombination mechanism. The  $\eta_0$  is obtained through the extrapolation of the arc of the circle of a cole-cole model which predicts the variation of the viscosity components ( $\eta''$  versus  $\eta'$ ) to be an arc of circle in the complex plane. This is explained more in detail elsewhere by Commereuc and co-workers[1, 2].

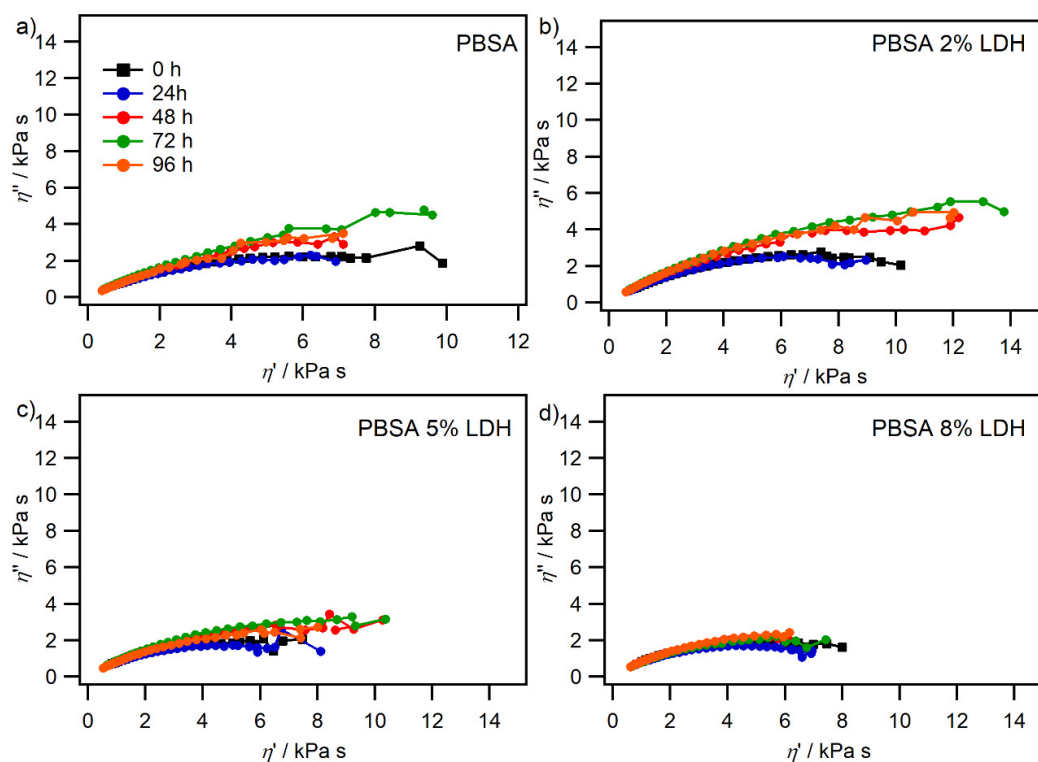

**Figure S10.** Cole-cole plots of unaged and aged (a) PBSA (b) PBSA 2 wt% LDH, (c) PBSA 5 wt% LDH and (d) PBSA 8 wt% LDH in the accelerated photoaging chamber.

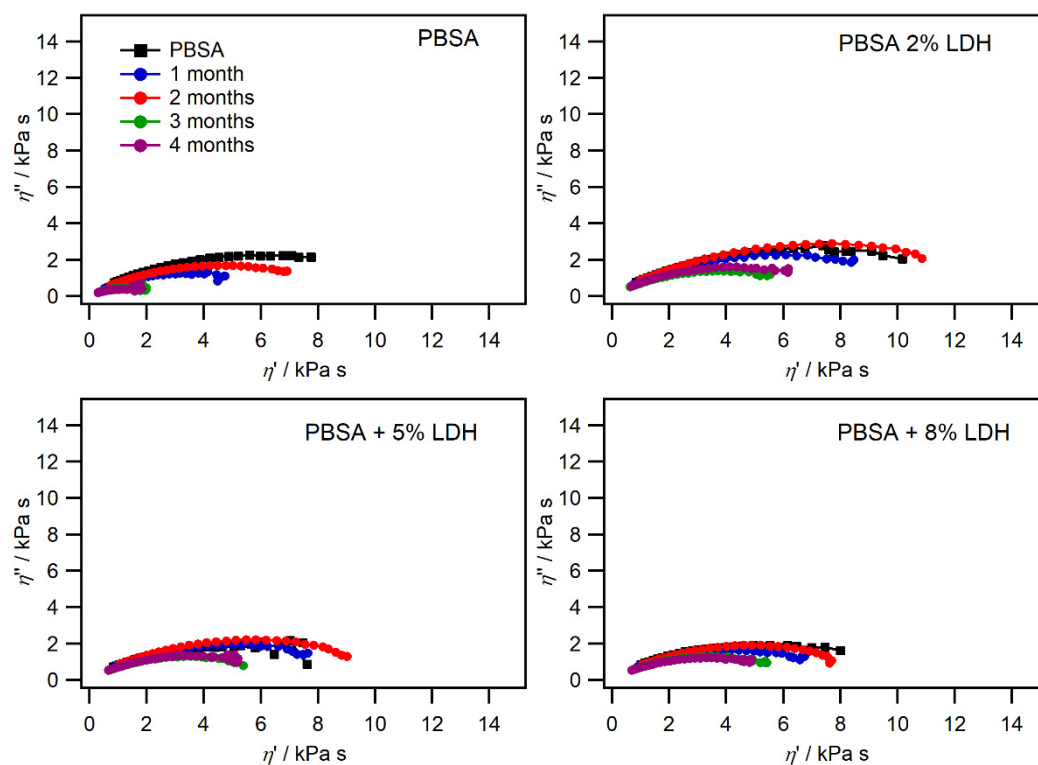

**Figure S11.** Cole-cole plots of naturally weathered (a) PBSA (b) PBSA 2 wt% LDH, (c) PBSA 5 wt% LDH and (d) PBSA 8 wt% LDH.



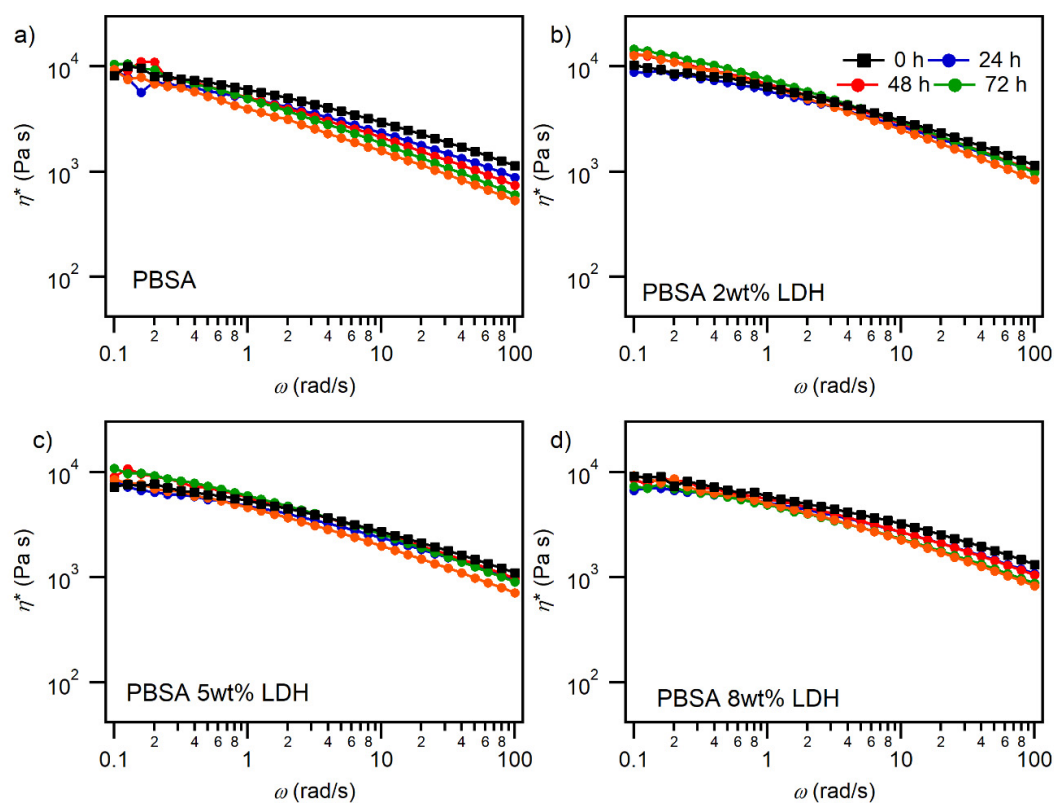

**Figure S12.** Dynamic viscosity relationship with frequency of unaged and aged (a) PBSA (b) PBSA 2 wt% LDH, (c) PBSA 5 wt% LDH and (d) PBSA 8 wt% LDH in SEPAP.

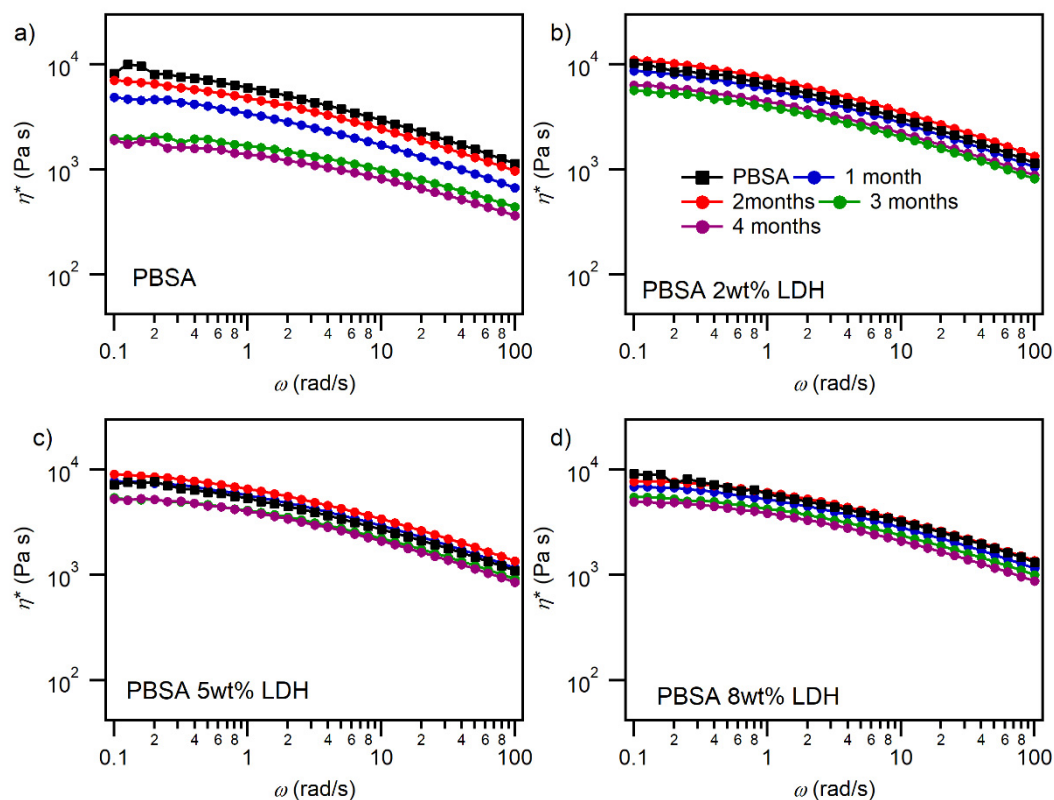

**Figure S13.** Dynamic viscosity relationship with frequency of naturally weathered (a) PBSA (b) PBSA 2 wt% LDH, (c) PBSA 5 wt% LDH and (d) PBSA 8 wt% LDH.
